# Supplementary material
Source: publisher figshare collection journal article supplement (https://gsajournals.figshare.com/ndownloader/files/22616243)
Supplement: Supplementary file 1 [file 22616243]

**Supplementary Table 1. Read output and quality of the four different MinION sequencing runs.**

|  | **Run 1** | **Run 2** | **Run 3** | **Run 4** |
| --- | --- | --- | --- | --- |
| **Library Type** | SQK–LSK109 | SQK-RAD004 | SQK-RAD004 | SQK-RAD004 |
| **Mean read length** | 793 | 2,845 | 4,049 | 3,505 |
| **Mean read quality:** | 7.5 | 8.2 | 8.9 | 8.9 |
| **Number of reads:** | 5,619,880 | 937,354 | 1,253,758 | 2,526,439 |
| **Read length N50:** | 1,158 | 6,654 | 8,556 | 6,919 |
| **Total bases:** | 4,454,832,013 | 2,666,680,634 | 5,076,315,340 | 8,855,545,432 |
